# Supplementary material for: Dominance induction of fruitlet shedding in Malus × domestica (L. Borkh): molecular changes associated with polar auxin transport
Source: PubMed Central journal article supplement (PMC2809502; doi:10.1186/1471-2229-9-139), 2009-11-26

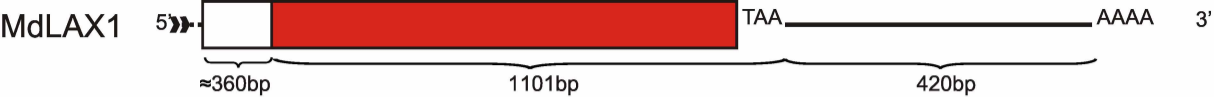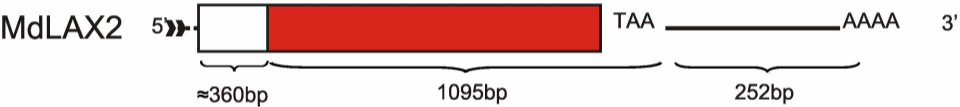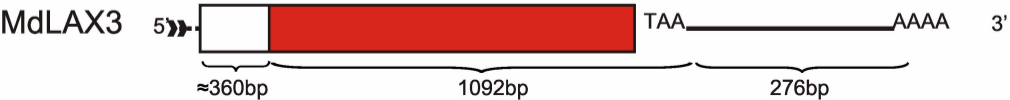

Supplement: 1471-2229-9-139-S2.pdf [file 1471-2229-9-139-S2.pdf]
